# Supplementary material
Source: Springer Nature journal article supplement (https://www.springermedizin.de/resource/supplementary/12888_2010_725_MOESM2_ESM.pdf/9478314)
Supplement: MOESM2 [file 9478314]

| Stage of contact/<br>Therapeutic window | Contact                  |                        |                                | Treatment                   |                         |                                             |
|-----------------------------------------|--------------------------|------------------------|--------------------------------|-----------------------------|-------------------------|---------------------------------------------|
|                                         | Stage 1:<br>Acquaintance | Stage 2:<br>Clique/fit | Stage 3:<br>True contact       | Stage 4:<br>Mutual strategy | Stage 5:<br>Active help | Stage 6:<br>Continuation of<br>fitting help |
| Toxic high                              | Over-involvement         | Over-disclosure        | Over-identification            | Rigidity                    | Paternalization         | Insistence                                  |
| Effective<br>intervention               | Interest                 | Closeness              | Understanding &<br>Recognition | Solidity                    | Responsibility          | Perseverance                                |
| Toxic low                               | Disinterest              | Distance               | Trivialization                 | Weakness                    | Noncommittal            | Negligence                                  |
